# Supplementary material for: Metagenomic analysis reveals linkages between cecal microbiota and feed efficiency in Xiayan chickens
Source: PubMed Central journal article supplement — Poult Sci. 2020 Oct 7;99(12):7066–75. doi: 10.1016/j.psj.2020.09.076 (PMC7705039; doi:10.1016/j.psj.2020.09.076), 2020-10-07
Supplement: mmc1.pdf [file mmc1.pdf]

## Supplementary Tables

**Table S1** The phenotype value of experimental animal

| <b>Samples</b> | <b>Initial weight(g)</b> | <b>Final weight(g)</b> | <b>Daily feed intake(g)</b> | <b>Daily body weight gain(g)</b> | <b>FCR</b> | <b>RFI</b> |
|----------------|--------------------------|------------------------|-----------------------------|----------------------------------|------------|------------|
| MH1            | 950                      | 1355                   | 93.2                        | 20.25                            | 4.60       | 14.92      |
| MH2            | 1100                     | 1585                   | 103.5                       | 24.25                            | 4.27       | 13.75      |
| MH3            | 920                      | 1350                   | 90.85                       | 21.5                             | 4.23       | 12         |
| ML1            | 845                      | 1295                   | 66.4                        | 22.5                             | 2.95       | -14.02     |
| ML2            | 1100                     | 1730                   | 87                          | 31.5                             | 2.76       | -12.84     |
| ML3            | 820                      | 1390                   | 72.5                        | 28.5                             | 2.54       | -12.21     |
| FH1            | 720                      | 1090                   | 83.85                       | 18.5                             | 4.53       | 13.68      |
| FH2            | 810                      | 1170                   | 84                          | 18                               | 4.67       | 11.45      |
| FH3            | 750                      | 1110                   | 81                          | 18                               | 4.50       | 10.53      |
| FL1            | 800                      | 1245                   | 63.8                        | 22.25                            | 2.87       | -14.72     |
| FL2            | 690                      | 1105                   | 62                          | 20.75                            | 2.99       | -10.48     |
| FL3            | 870                      | 1320                   | 71.1                        | 22.5                             | 3.16       | -10.16     |

FCR = Daily feed intake/Daily body weight gain.

**Table S2** Summary of metagenomic sequencing data

| <b>Sample</b> | <b>Raw data(Mbp)</b> | <b>Non host data(Mbp)</b> | <b>Clean data(Mbp)</b> | <b>Assembled scaftig length (bp)</b> | <b>Scaftig number</b> | <b>Average length of scaftigs (bp)</b> | <b>N50 (bp)</b> |
|---------------|----------------------|---------------------------|------------------------|--------------------------------------|-----------------------|----------------------------------------|-----------------|
| M-HFE1        | 6,149                | 6,101                     | 6,129                  | 219,381,694                          | 133,514               | 1,643                                  | 2,409           |
| M-HFE2        | 6,861                | 6,428                     | 6,847                  | 215,772,014                          | 136,786               | 1,577                                  | 2,244           |
| M-HFE3        | 6,722                | 6,142                     | 6,697                  | 197,940,659                          | 123,144               | 1,607                                  | 2,295           |
| M-LFE1        | 7,274                | 6,790                     | 7,231                  | 213,076,618                          | 149,025               | 1,430                                  | 1,729           |
| M-LFE2        | 6,266                | 6,108                     | 6,249                  | 187,104,352                          | 124,199               | 1,506                                  | 2,076           |
| M-LFE3        | 7,867                | 7,659                     | 7,828                  | 231,896,541                          | 157,680               | 1,471                                  | 1,945           |
| F-HFE1        | 6,238                | 5,952                     | 6,218                  | 173,764,110                          | 108,892               | 1,596                                  | 2,357           |
| F-HFE2        | 7,134                | 6,407                     | 7,100                  | 213,848,248                          | 147,553               | 1,449                                  | 1,840           |
| F-HFE3        | 6,704                | 6,284                     | 6,685                  | 184,127,692                          | 117,558               | 1,566                                  | 2,223           |
| F-LFE1        | 6,557                | 6,055                     | 6,545                  | 190,280,485                          | 151,136               | 1,259                                  | 1,414           |
| F-LFE2        | 6,934                | 6,853                     | 6,920                  | 191,680,602                          | 132,638               | 1,445                                  | 1,890           |
| F-LFE3        | 6,560                | 6,257                     | 6,546                  | 234,644,760                          | 155,694               | 1,507                                  | 1,997           |

M-HFE, M-LFE, F-HFE, F-LFE denote the high feed efficiency group in male chickens, the low feed efficiency group in male chickens, the high feed efficiency group in female chickens, the low feed efficiency group in female chickens, respectively.

**Table S3** The LDA score of potential biomarkers in the cecum for the different FE groups

| <b>Group</b> | <b>Taxonomy</b>                           | <b>LDA_score</b> |
|--------------|-------------------------------------------|------------------|
| F-LFE        | <i>g__Blautia</i>                         | 5.017            |
| F-LFE        | <i>s__Campylobacter_avium</i>             | 4.826            |
| F-LFE        | <i>g__Faecalibacterium</i>                | 4.808            |
| F-LFE        | <i>s__Parabacteroides_sp_CAG_409</i>      | 4.669            |
| F-LFE        | <i>o__Veillonellales</i>                  | 4.337            |
| F-LFE        | <i>g__Collinsella</i>                     | 4.297            |
| F-LFE        | <i>s__Bacteroides_sp_Marseille_P3166</i>  | 4.262            |
| F-LFE        | <i>g__Erysipelatoclostridium</i>          | 4.221            |
| F-LFE        | <i>s__Blautia_sp_An46</i>                 | 4.109            |
| F-LFE        | <i>s__Bacteroidales_bacterium_WCE2004</i> | 4.103            |
| F-LFE        | <i>s__Bacteroides_sp_CAG_598</i>          | 4.090            |
| F-LFE        | <i>g__Butyricimonas</i>                   | 4.006            |
| F-HFE        | <i>f__Enterobacteriaceae</i>              | 4.376            |
| F-HFE        | <i>p__Proteobacteria</i>                  | 4.122            |
| M-HFE        | <i>s__Barnesiella_sp_An22</i>             | 4.511            |
| M-HFE        | <i>s__Lactobacillus_oris</i>              | 4.275            |
| M-LFE        | <i>s__Bacteroides_sp_An322</i>            | 4.987            |
| M-LFE        | <i>s__Subdoligranulum_variabile</i>       | 4.486            |
| M-LFE        | <i>s__Helicobacter_pullorum</i>           | 4.342            |
| M-LFE        | <i>f__Unclassified_Lentisphaerae</i>      | 4.233            |
| M-LFE        | <i>c__Unclassified_Lentisphaerae</i>      | 4.182            |
| M-LFE        | <i>o__Unclassified_Lentisphaerae</i>      | 4.170            |

**Table S4** The significantly different KEGG pathway between high FE and low FE group of chickens

| <b>Group</b> | <b>Ko_ID</b> | <b>Pathway</b>                                       | <b>P-value</b> |
|--------------|--------------|------------------------------------------------------|----------------|
| M-HFE        | ko00361      | Chlorocyclohexane and chlorobenzene degradation      | 0.006          |
| M-HFE        | ko04512      | ECM-receptor interaction                             | 0.018          |
| M-HFE        | ko04933      | AGE-RAGE signaling pathway in diabetic complications | 0.023          |
| M-HFE        | ko00982      | Drug metabolism - cytochrome P450                    | 0.039          |
| F-HFE        | ko05146      | Amoebiasis                                           | 0.004          |
| F-HFE        | ko02040      | Flagellar assembly                                   | 0.047          |
| F-LFE        | ko00040      | Pentose and glucuronate interconversions             | 0.047          |

## Supplementary Figures

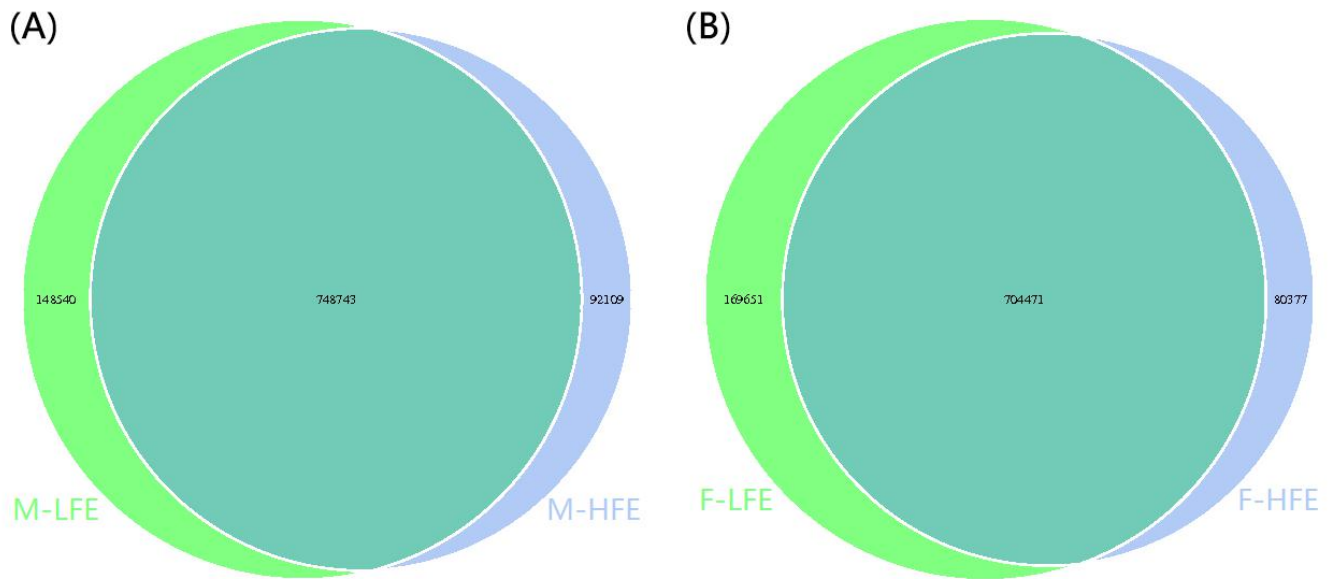

**Figure S1** Venn diagram of intersection between the genes in the high FE group and low FE group. (A) Venn diagram of male chickens. (B) Venn diagram of female chickens.

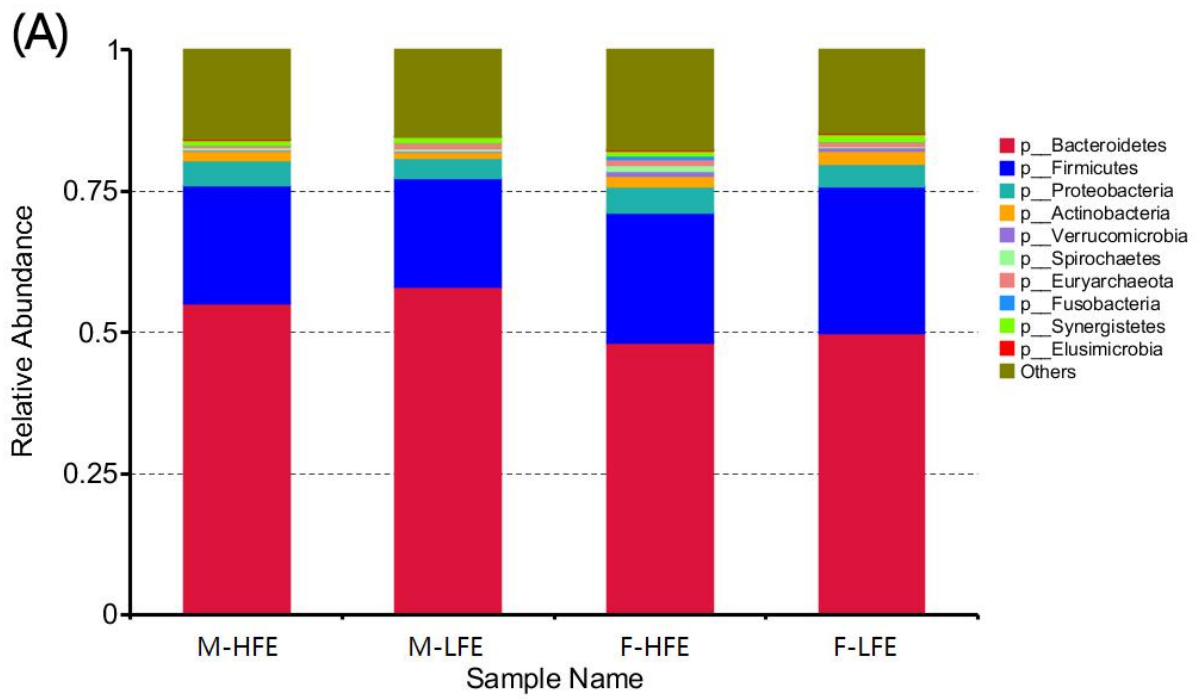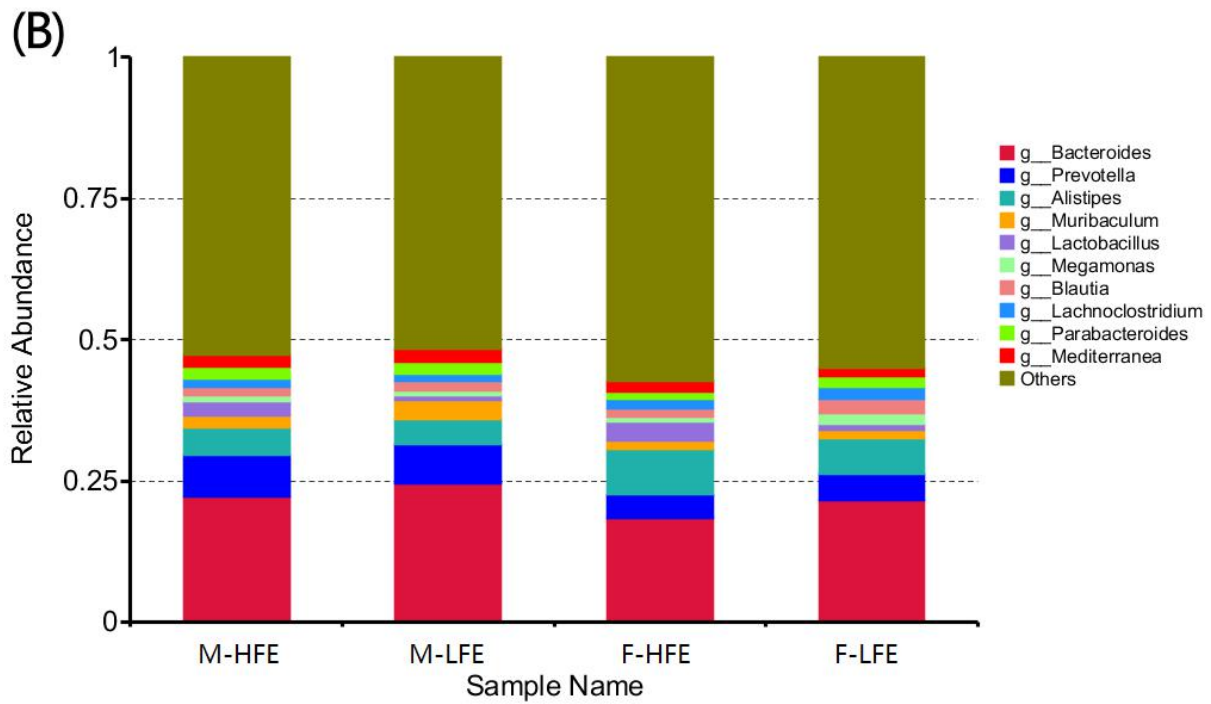

**Figure S2** Predominant microbes in caecum at (A) phyla and (B) genus level

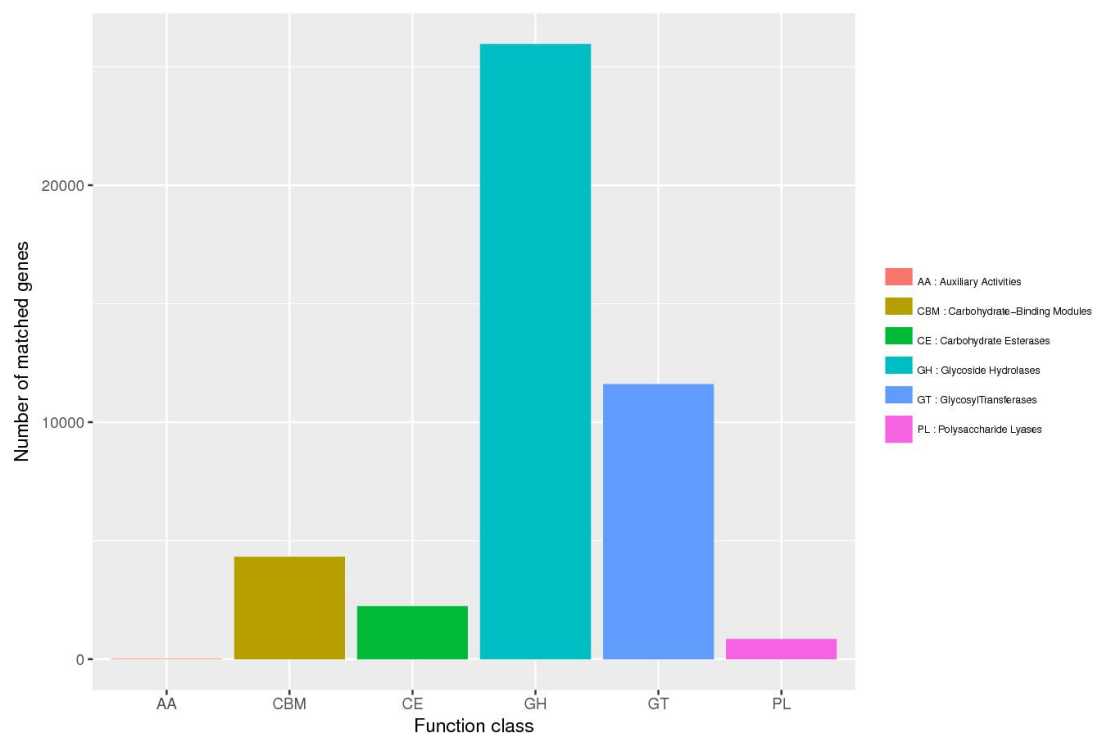

**Figure S3** Functional composition of genes in the CAZy database for high and low FE groups.

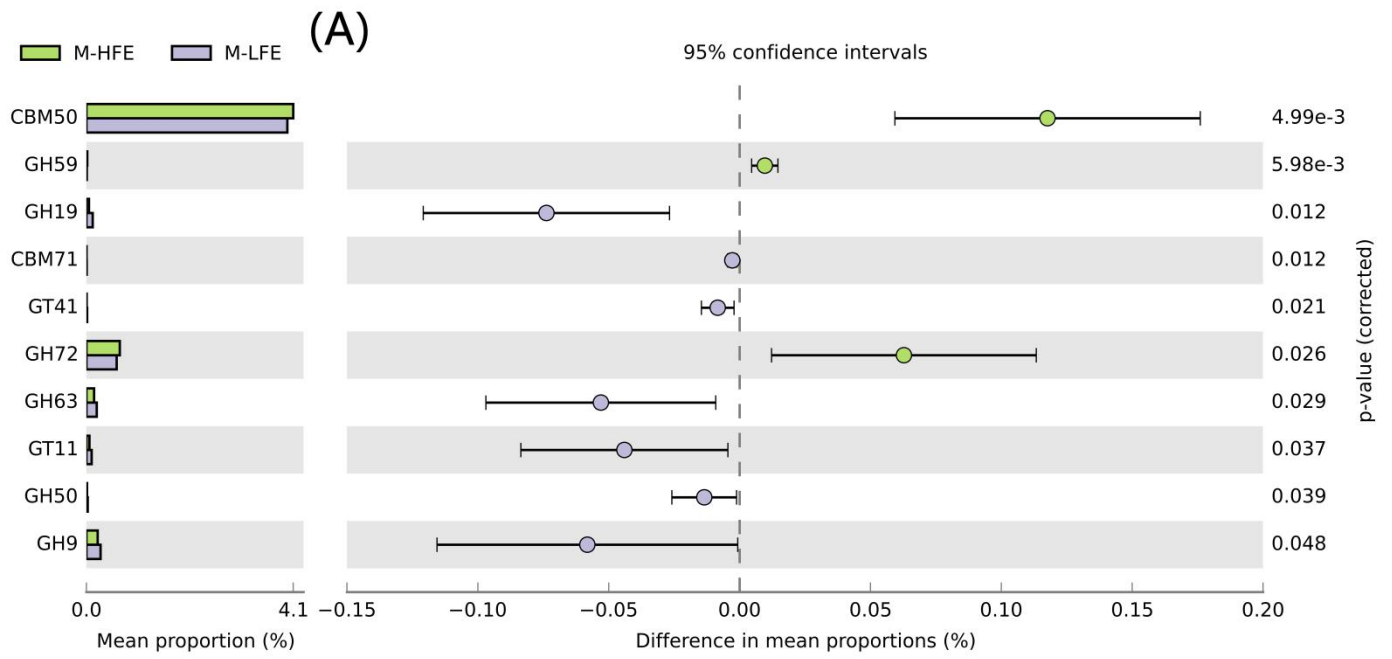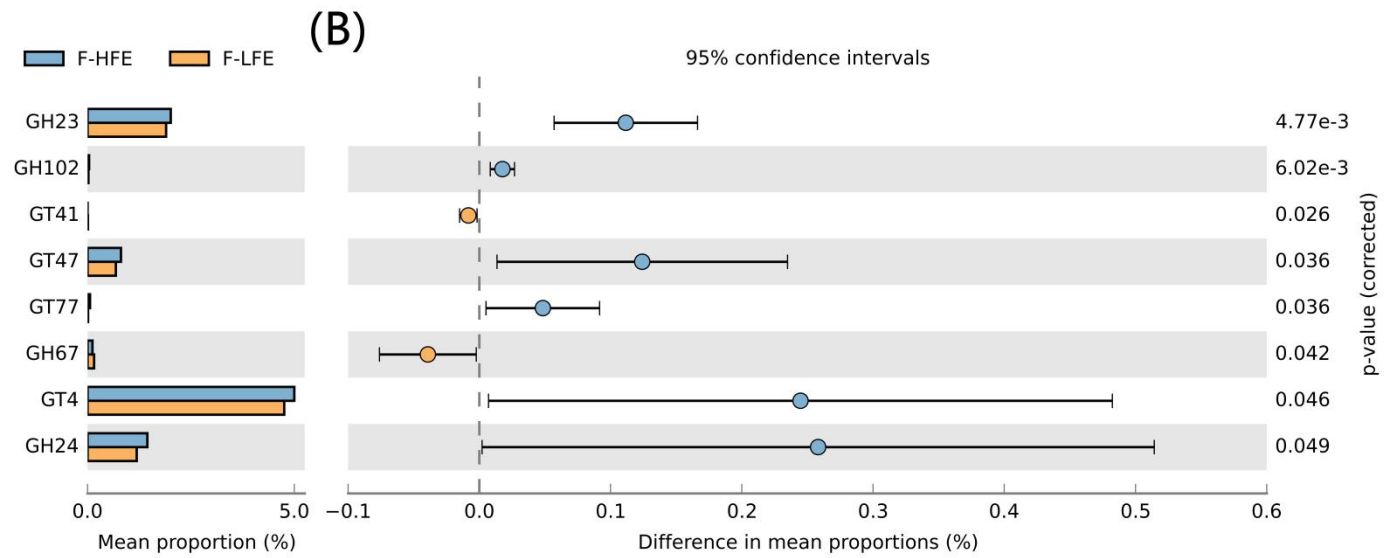

**Figure S4** Differential CAZy families between high and low FE groups

(A) The CAZy families detected in male chickens. (B) The CAZy families detected in female chickens.
